# Supplementary material
Source: Springer Nature journal article supplement (https://www.springermedizin.de/resource/supplementary/13229_2014_148_MOESM4_ESM.pdf/9676288)

A)

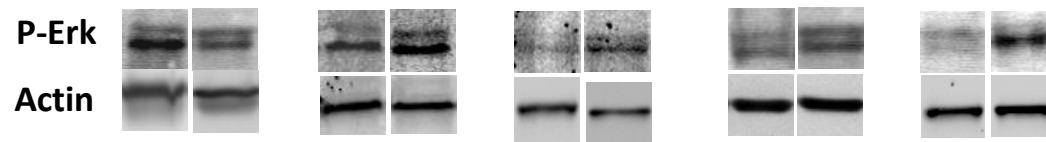

B)

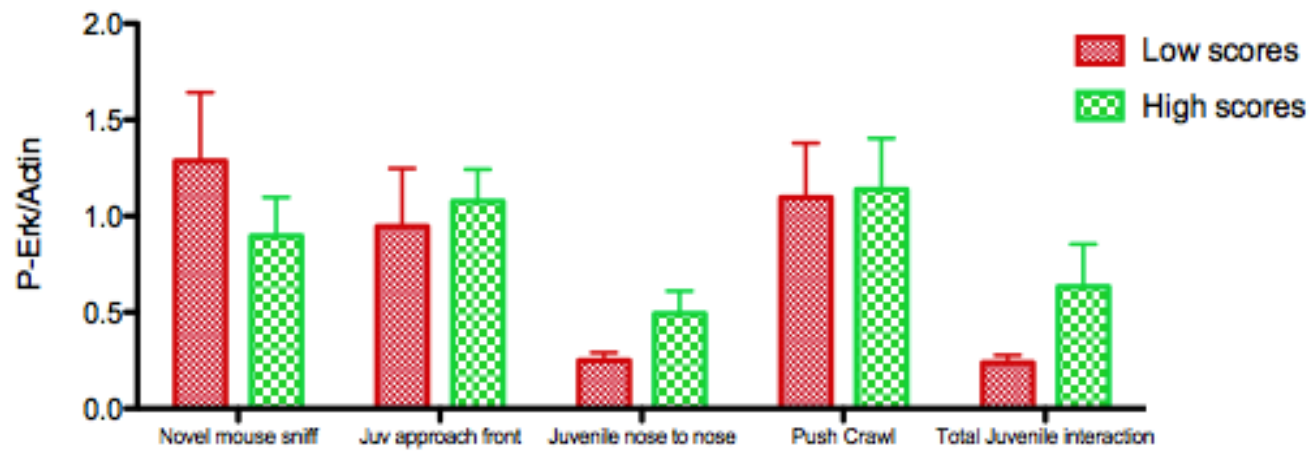

Supplement: MOESM4 [file 9676288]
